# Supplementary material for: Controllable Synthesis, Photocatalytic Property, and Mechanism of a Novel POM-Based Direct Z-Scheme Nano-Heterojunction α-Fe2O3/P2Mo18
Source: MDPI journal article supplement (doi:10.3390/molecules28186671), 2023-09-18
Supplement: s1 [file s1]

# Supporting materials

## Controllable Synthesis Photocatalytic Property and Mechanism of a Novel Direct Z-scheme POMs-based Nano Heterojunction $\alpha$ -Fe<sub>2</sub>O<sub>3</sub>/P<sub>2</sub>Mo<sub>18</sub>

Yanlin Zhang,<sup>a</sup> MingYu Zhao,<sup>a</sup> Jubo Huang,<sup>a</sup> Nan Zhao,<sup>a</sup> Haihui Yu,<sup>\*a</sup>

<sup>a</sup> School of Chemical Engineering, Northeast Electric Power University, Jilin 132012, P. R. China

\*Correspondence: author. E-mail: hhyu@neepu.edu.cn

### Characterization

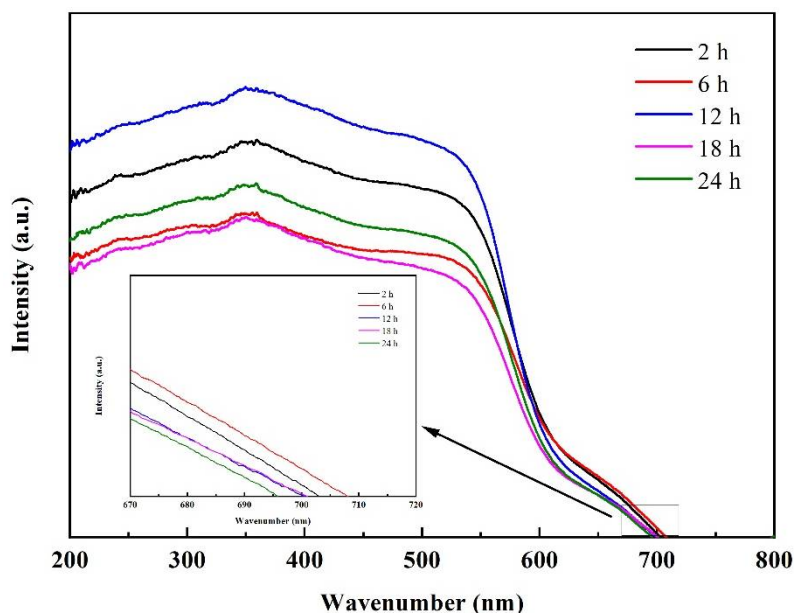

Fig. S1. DRS spectra of Fe<sub>2</sub>O<sub>3</sub>

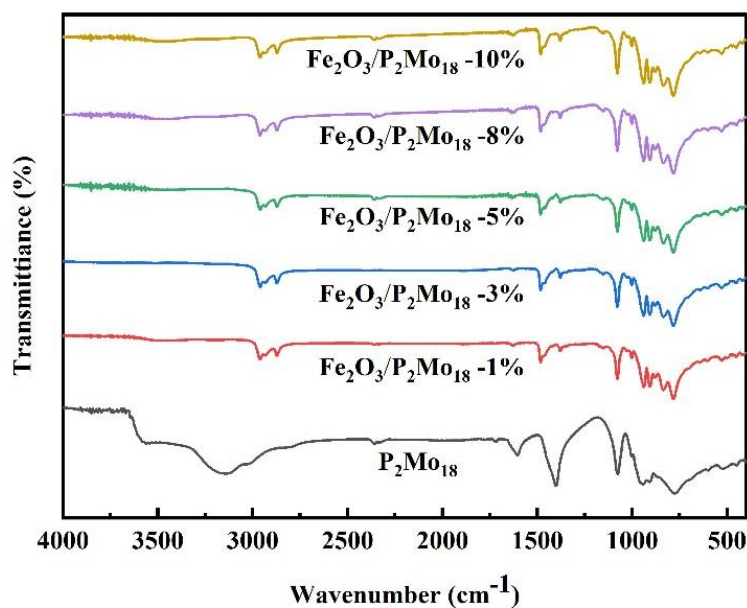

Fig S2. FT-IR spectra of the hybrid materials.

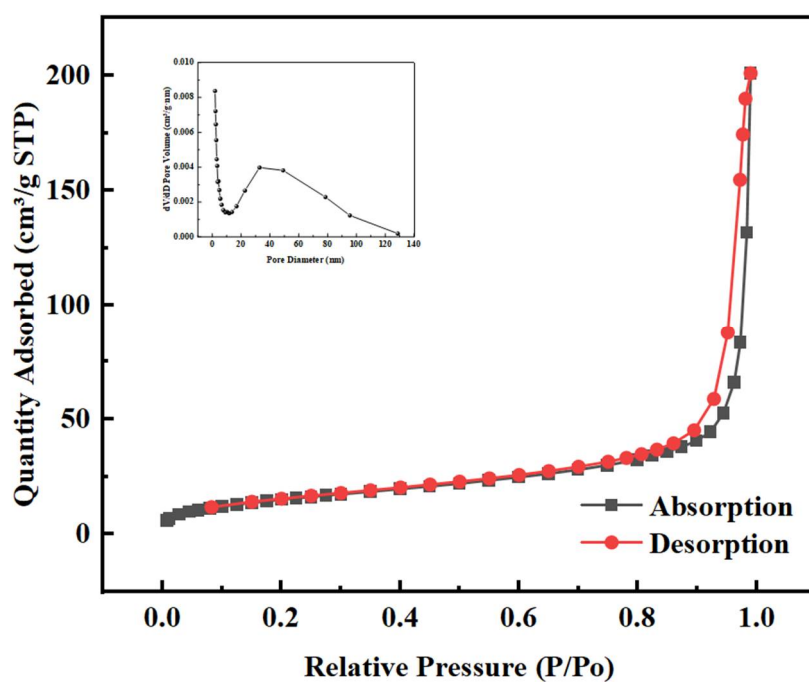

Fig. S3.  $N_2$  adsorption desorption isotherms and pore size distribution curves (Insert)

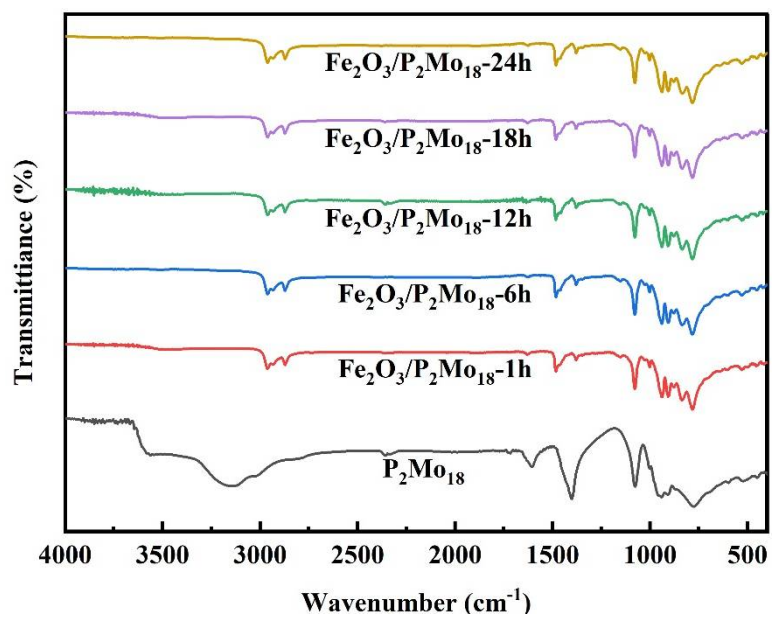

Fig. S4. FT-IR spectra of the hybrid materials with different reaction times of  $Fe_2O_3$

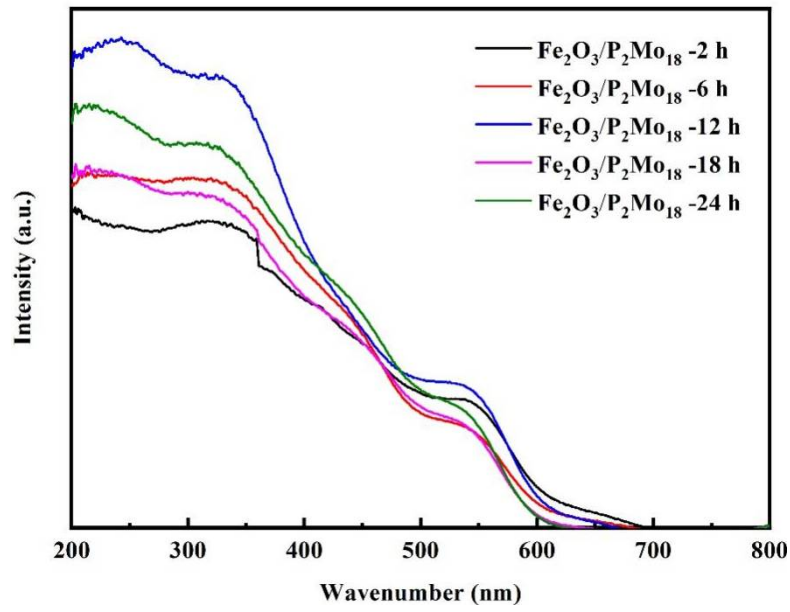

Fig. S5. UV-vis spectra of composites with different reaction times of  $\text{Fe}_2\text{O}_3$

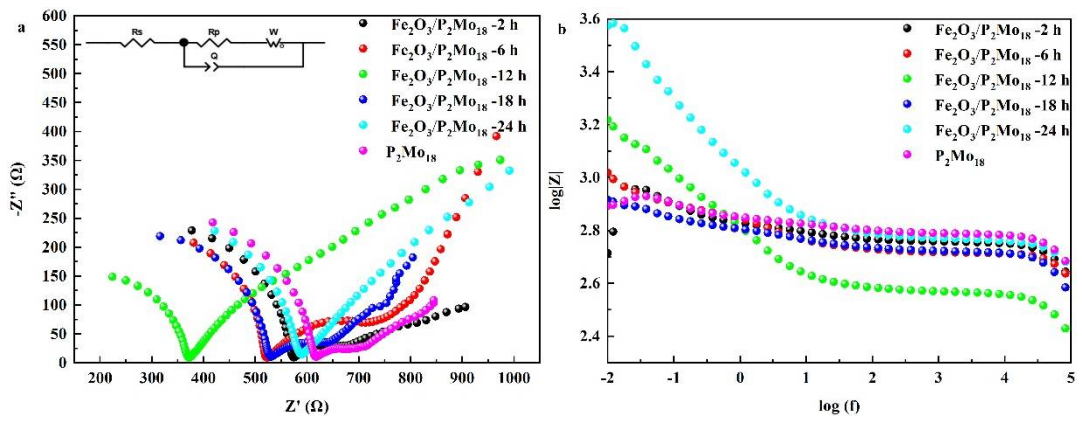

Fig. S6. Nyquist (a) and Bode (b) plots of composites made from  $\text{Fe}_2\text{O}_3$  with different reaction times

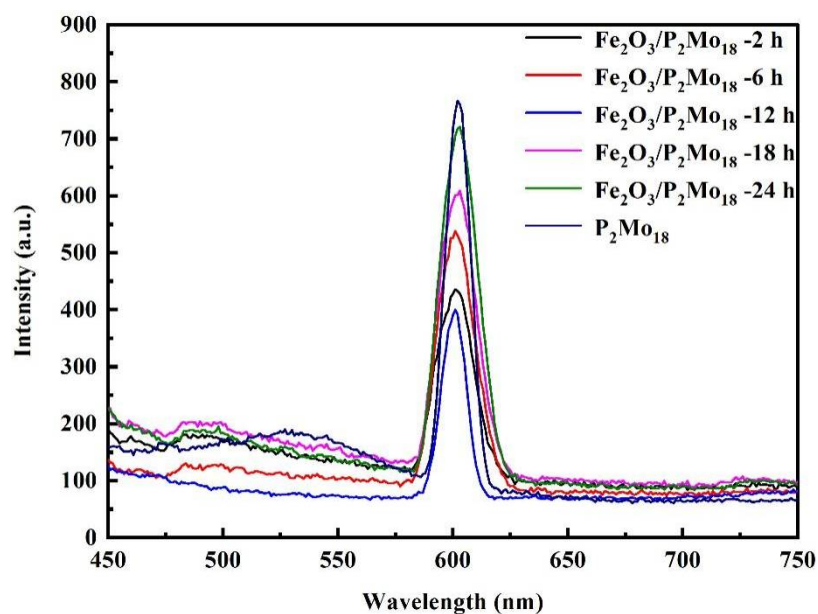

Fig. S7. Photoluminescence spectra of composites with different reaction times of  $\text{Fe}_2\text{O}_3$

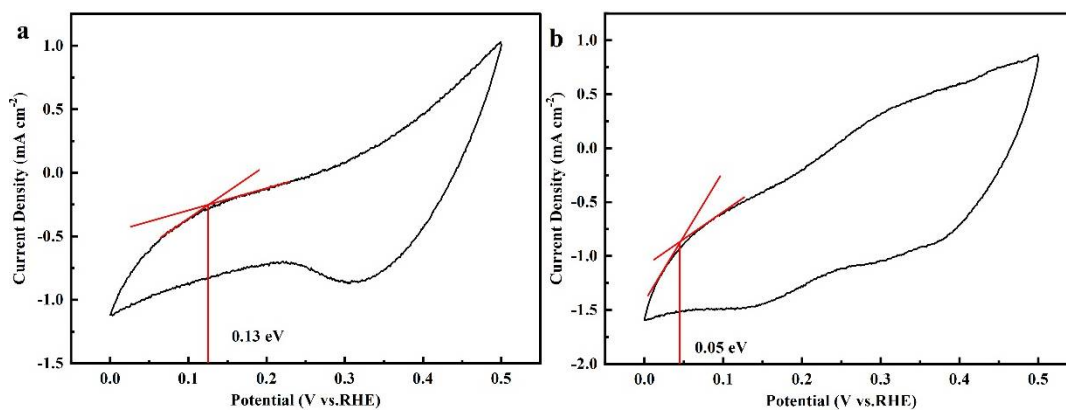

Fig. S8. the CV test diagram of polyoxoanion  $\text{P}_2\text{Mo}_{18}$  (a),  $\text{Fe}_2\text{O}_3$  (b)

Table S1 The comparison of MB degradation activity of  $\text{P}_2\text{Mo}_{18}/\text{Fe}_2\text{O}_3$ -5% with literature.

| Photocatalyst                                         | Concentration<br>( $\text{mg}\cdot\text{L}^{-1}$ ) | Dosage<br>( $\text{g}\cdot\text{L}^{-1}$ ) | Time<br>(min) | Remove<br>(%) | Reference |
|-------------------------------------------------------|----------------------------------------------------|--------------------------------------------|---------------|---------------|-----------|
| $\text{Fe}_2\text{O}_3$                               | 10                                                 | 0.5                                        | 120           | 73            | 1         |
| $\text{TiO}_2$                                        | 13.5                                               | 0.2                                        | 60            | 78            | 2         |
| $\alpha\text{-Fe}_2\text{O}_3/\text{BaTiO}_3$         | 20                                                 | 0.5                                        | 180           | 94            | 3         |
| $\alpha\text{-Fe}_2\text{O}_3/\text{Bi}_2\text{WO}_6$ | 5                                                  | 0.2                                        | 25            | 98            | 4         |
| $\text{K}_8/\text{EuW}_{10}$                          | 2                                                  | 0.25                                       | 2880          | 91            | 5         |
| $\text{CdS@ZIF-8}$                                    | 10                                                 | 1                                          | 120           | 72            | 6         |
| $\text{ZnO/CeO}_2$                                    | 10                                                 | 0.5                                        | 60            | 70            | 7         |
| $\text{MoS}_2/\text{ZnO}$                             | 10                                                 | 0.05                                       | 180           | 93            | 8         |
| $\text{Fe}_2\text{O}_3/\text{P}_2\text{Mo}_{18}$      | 20                                                 | 0.1                                        | 90            | 98.9          | This work |

Table S2 The comparison of Cr reduction performance of P<sub>2</sub>Mo<sub>18</sub>/Fe<sub>2</sub>O<sub>3</sub>-5% with literature.

| Photocatalyst                                                     | Concentration<br>(mg·L <sup>-1</sup> ) | Dosage<br>(g·L <sup>-1</sup> ) | Time<br>(min) | Remove<br>(%) | Reference |
|-------------------------------------------------------------------|----------------------------------------|--------------------------------|---------------|---------------|-----------|
| BiVO <sub>4</sub> /FeVO <sub>4</sub><br>@rGO                      | 20                                     | 0.025                          | 90            | 90.9          | 9         |
| Co <sub>3</sub> O <sub>4</sub> /g-C <sub>3</sub> N <sub>4</sub>   | 15                                     | 0.02                           | 150           | 92.6          | 10        |
| TiO <sub>2</sub>                                                  | 10                                     | 0.01                           | 180           | 62            | 11        |
| TiO <sub>2</sub> /SiO <sub>2</sub>                                | 3                                      | 0.1                            | 180           | 93            | 12        |
| Fe <sub>3</sub> O <sub>4</sub> -ZnAl-LDH<br>and TiO <sub>2</sub>  | 20                                     | 0.1                            | 420           | 98            | 13        |
| α-Fe <sub>2</sub> O <sub>3</sub> /g-C <sub>3</sub> N <sub>4</sub> | 10                                     | 0.1                            | 150           | 98            | 14        |
| AgI/BiVO <sub>4</sub>                                             | 15                                     | 0.02                           | 100           | 71            | 15        |
| Ag <sub>2</sub> CO <sub>3</sub> /BiVO <sub>4</sub>                | 15                                     | 0.02                           | 150           | 70            | 16        |
| Fe <sub>2</sub> O <sub>3</sub> /P <sub>2</sub> Mo <sub>18</sub>   | 50                                     | 0.1                            | 90            | 95.9          | This work |

Reference:

- [1] Zong M, Song D, Zhang X, et al. Environmental Science and Technology, 2021, 55(1):677-688
- [2] Maleki H, Bertola V. ACS Applied Nano Materials, 2019, 2(11):7237-7244
- [3] Yahia B, Faouzi S, Mohamed T. Journal of Photochemistry and Photobiology A: Chemistry, 2023, 439: 114634.
- [4] Wang W, Zhao W, Zhang H, et al. Chinese journal of catalysis, 2021, 42(1): 97-106.
- [5] Tong L, Wang Z, Xia C, et al. Journal of Physical Chemistry B, 2017, 121(46):10566-10573
- [6] Ankur M, Mala N, Shanid M, et al. Acs Omega, 2018, 3(7):8288-8308
- [7] Rajendran S, Khan M M, Gracia F, et al. Scientific reports, 2016, 6(1): 31641.
- [8] Chang Y C, Lin Y W, Lu M Y. Materials Chemistry and Physics, 2021, 266: 124560.
- [9] Yang R, Zhu Z, Hu C, et al. Chemical engineering journal, 2020, 390: 124522.
- [10] Zhao W, Li J, She T, et al. Journal of Hazardous Materials, 2021, 402: 123839.
- [11] Preethi R, Singh S. Journal of Environmental Management, 2023, 326: 116831.
- [12] Eddy D R, Ishmah S N, Permana M D, et al. Catalysts, 2020, 10(11): 1248.
- [13] Yang Y, Li J, Yan T, et al. Journal of colloid and interface science, 2020, 562: 493-501.
- [14] Xiao D, Dai K, Qu Y, et al. Applied Surface Science, 2015, 358: 181-187.
- [15] Huang Z, Dai X, Huang Z, et al. Chemosphere, 2019, 221: 824-833.
- [16] Yuan L, Weng B, Colmenares J C, et al. Small, 2017, 13(48): 1702253.
